# Supplementary material for: First-principles study of magnetism in some novel MXene materials
Source: Royal Society of Chemistry journal article supplement (doi:10.1039/d0ra03643a), 2020-01-01
Supplement: d0ra03643a1.pdf [file d0ra03643a1.pdf]

## First principles study on magnetism in some novel MXene materials

Kan Luo<sup>a,b</sup>, Xian-Hu Zha<sup>c</sup>, Qing Huang<sup>b</sup>, Cheng-Te Lin<sup>d</sup>, Minghui Yang<sup>b</sup>, Shenghu Zhou<sup>a,\*</sup> and Shiyu Du<sup>b,\*</sup>

<sup>a</sup>School of Chemical Engineering, East China University of Science and Technology, Shanghai, China

<sup>b</sup>Engineering Laboratory of Advanced Energy Materials, Ningbo Institute of Materials Technology and Engineering, Chinese Academy of Sciences, Ningbo, Zhejiang, China

<sup>c</sup>Center for Quantum Computing, Peng Cheng Laboratory, Shenzhen, China

<sup>d</sup>Key Laboratory of Marine Materials and Related Technologies, Zhejiang Key Laboratory of Marine Materials and Protective Technologies, Ningbo Institute of Materials Engineering and Technology, Chinese Academy of Sciences, Ningbo, Zhejiang, China

**Table S1** The calculated lattice constants, total energies (eV) and atomic magnetic moment for the metal atoms ( $\mu\text{B}/\text{atom}$ ) of 1H and 1T type  $\text{M}_2\text{C}$  ( $\text{M}=\text{Sc}, \text{Ti}, \text{Fe}, \text{Co}, \text{Ni}, \text{Cu}, \text{Zn}$ ) MXenes in AFM, FM and NM configurations, and the ground energy configuration are highlighted in bold-typeface.

|                       |    |           | $a$ (Å)      | $E$ (eV)       | Magnetization |                       |            |              | $a$ (Å)        | $E$ (eV)        | Magnetization |
|-----------------------|----|-----------|--------------|----------------|---------------|-----------------------|------------|--------------|----------------|-----------------|---------------|
| $\text{Sc}_2\text{C}$ | 1H | AFM       | 3.283        | -37.290        | 0.328         | $\text{Ti}_2\text{C}$ | 1H         | AFM          | 3.042          | -40.715         | 0.812         |
|                       |    | FM        | 3.281        | -37.298        | 0.389         |                       |            | FM           | 3.042          | -40.702         | 0.521         |
|                       |    | NM        | 3.251        | -37.077        |               |                       |            | NM           | 3.042          | -40.429         |               |
|                       | 1T | AFM       | 3.339        | -38.386        | 0.213         | 1T                    | <b>AFM</b> | <b>3.038</b> | <b>-42.060</b> | <b>0.629</b>    |               |
|                       |    | FM        | 3.341        | -38.415        | 0.422         |                       | FM         | 3.059        | -42.009        | 0.488           |               |
|                       |    | NM        | 3.322        | -38.290        |               |                       | NM         | 3.022        | -41.759        |                 |               |
| $\text{Fe}_2\text{C}$ | 1H | AFM       | 2.622        | -42.537        | 1.902         | $\text{Co}_2\text{C}$ | 1H         | AFM          | 2.540          | -41.210         | 1.349         |
|                       |    | FM        | 2.602        | -43.014        | 2.192         |                       |            | <b>FM</b>    | <b>2.562</b>   | <b>-41.313</b>  | <b>1.260</b>  |
|                       |    | NM        | 2.522        | -42.271        |               |                       |            | NM           | 2.464          | -40.677         |               |
|                       | 1T | AFM       | 2.833        | -43.476        | 2.223         | 1T                    | AFM        | 2.824        | -41.135        | 1.049           |               |
|                       |    | <b>FM</b> | <b>2.794</b> | <b>-43.528</b> | <b>2.077</b>  |                       | FM         | 2.875        | -41.075        | 0.998           |               |
|                       |    | NM        | 2.857        | -41.917        |               |                       | NM         | 2.865        | -40.738        |                 |               |
| $\text{Ni}_2\text{C}$ | 1H | NM        | 2.584        | -39.015        |               | $\text{Cu}_2\text{C}$ | 1H         | <b>NM</b>    | <b>2.700</b>   | <b>-35.9165</b> |               |
|                       | 1T | <b>NM</b> | <b>2.899</b> | <b>-39.453</b> |               |                       | 1T         | NM           | 2.905          | -35.75592       |               |
| $\text{Zn}_2\text{C}$ | 1H | NM        | 3.035        | -32.177        |               |                       |            |              |                |                 |               |
|                       | 1T | <b>NM</b> | <b>3.471</b> | <b>-32.992</b> |               |                       |            |              |                |                 |               |

\* Corresponding author

E-mail address: [zhoushenghu@ecust.edu.cn](mailto:zhoushenghu@ecust.edu.cn) (S. Zhou) [dushiyu@nimte.ac.cn](mailto:dushiyu@nimte.ac.cn) (S. Du)

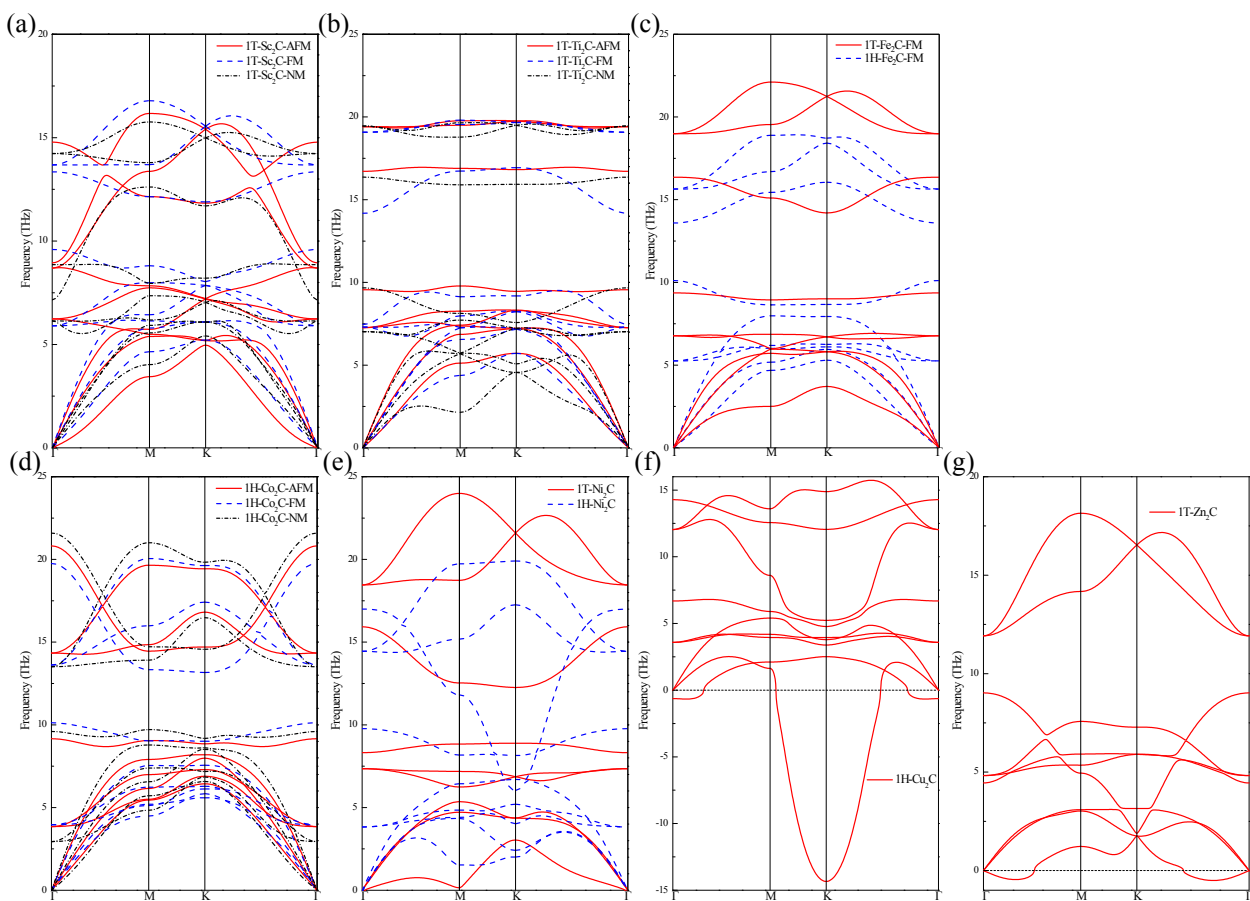

**Fig. S1** The phonon dispersions of  $\text{Sc}_2\text{C}$  (a),  $\text{Ti}_2\text{C}$  (b),  $\text{Fe}_2\text{C}$  (c),  $\text{Co}_2\text{C}$  (d),  $\text{Ni}_2\text{C}$  (e),  $\text{Cu}_2\text{C}$  (f) and  $\text{Zn}_2\text{C}$  (g) MXenes along the high symmetry points  $\Gamma(0, 0, 0) \rightarrow \text{M}(\frac{1}{2}, 0, 0) \rightarrow \text{K}(\frac{1}{3}, \frac{1}{3}, 0) \rightarrow \Gamma(0, 0, 0)$  of the Brillouin zone.

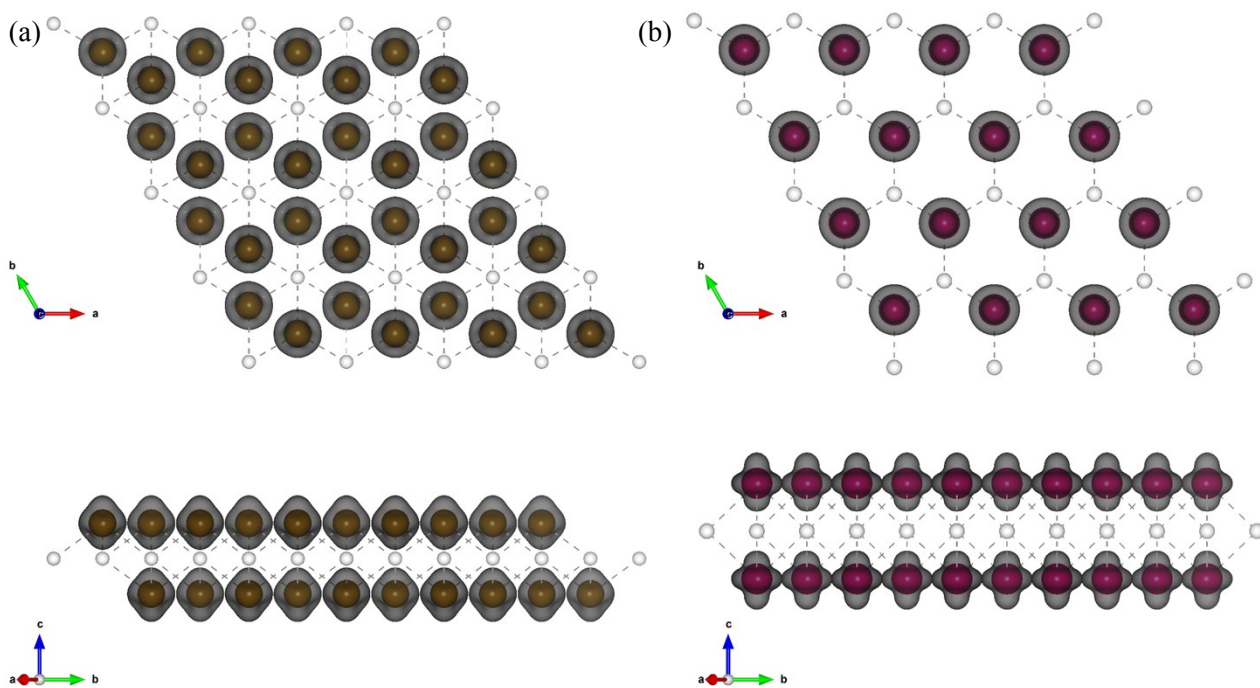

**Fig. S2** Top and side view of the spin charge density distribution of the FM magnetic configuration  $1\text{T-Fe}_2\text{C}$  (a) and  $1\text{H-Co}_2\text{C}$  (b).

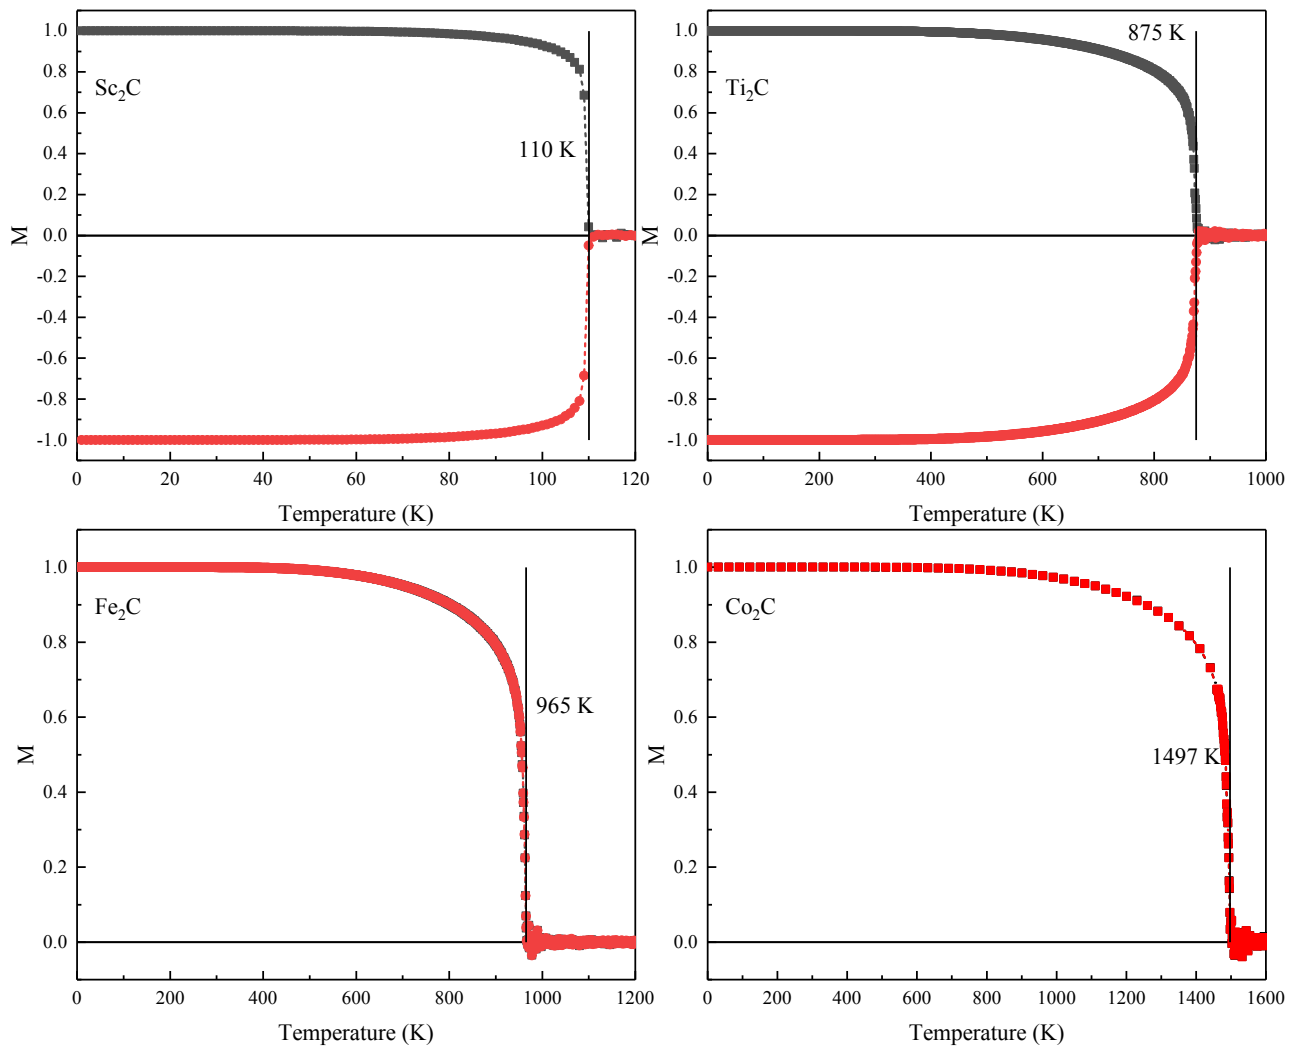

**Fig. S3** Average magnetization orientation as a function of temperature for magnetic 1T- $\text{Sc}_2\text{C}$  (a), 1T- $\text{Ti}_2\text{C}$  (b), 1T- $\text{Fe}_2\text{C}$  (c) and 1H- $\text{Co}_2\text{C}$  (d) MXenes from Monte Carlo simulations.
